# Supplementary material for: Efficient clearance of periodontitis pathogens by S. gordonii membrane-coated H2O2 self-supplied nanocomposites in a “Jenga” style
Source: Royal Society of Chemistry journal article supplement (doi:10.1039/d3bm00641g), 2023-01-01
Supplement: d3bm00641g1.pdf [file d3bm00641g1.pdf]

### ***Supplemental Information***

#### **Efficient clearance of periodontitis pathogens by *S. gordonii* membrane-coated H<sub>2</sub>O<sub>2</sub> self-supplied nanocomposites in a “Jenga” style**

Qinghua Cao,<sup>a</sup> Xiang Xiao,<sup>a</sup> Chengcheng Tao,<sup>a</sup> Rui Shi,<sup>\*a,b</sup> Rui Lv,<sup>a</sup> Ruochen Guo,<sup>a</sup> Xinyi Li,<sup>a</sup> Baiyan Sui,<sup>c</sup> Xin Liu,<sup>c</sup> Jian Liu,<sup>\*a</sup>

a. Institute of Functional Nano & Soft Materials (FUNSOM), Jiangsu Key Laboratory for Carbon-Based Functional Materials & Devices, Soochow University, 199 Ren'ai Rd, Suzhou 215123, Jiangsu, P. R. China. E-mail:

jliu@suda.edu.cn

b. University of Groningen and University Medical Center Groningen, Department of Biomedical Engineering, Antonius Deusinglaan 1, 9713 AV Groningen, The Netherlands. E-mail: r.shi@umcg.nl

c. Department of Dental Materials, Shanghai Biomaterials Research & Testing Center, Shanghai Ninth People's Hospital, Shanghai Jiao Tong University School of Medicine; College of Stomatology, Shanghai Jiao Tong University; National Center for Stomatology; National Clinical Research Center for Oral Diseases; Shanghai Key Laboratory of Stomatology, Shanghai, 200011, P.R. China.

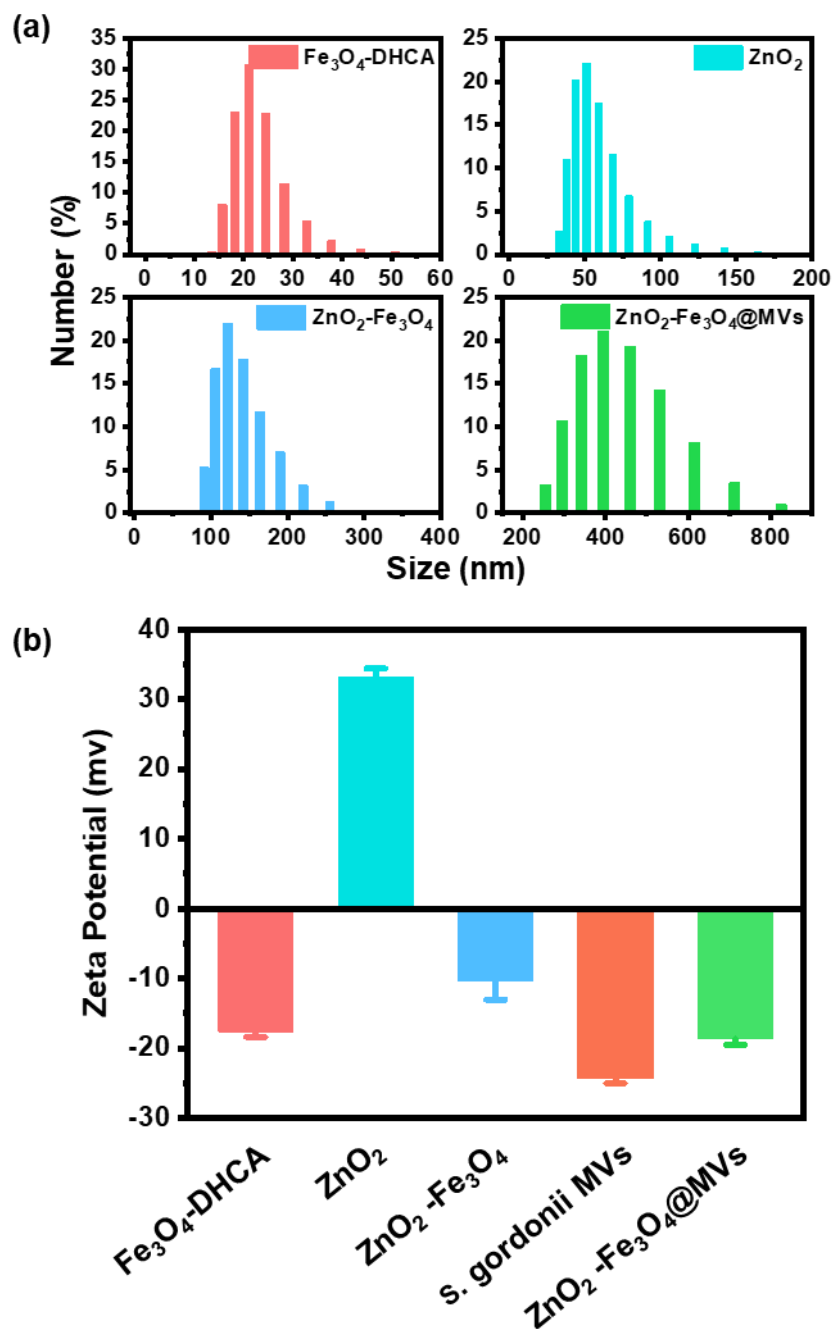

**Fig. S1.** DLS and zeta potential characterization of each part of the materials. (a) DLS characterization of Fe<sub>3</sub>O<sub>4</sub>-DHCA NPs, ZnO<sub>2</sub> NPs, ZnO<sub>2</sub>-Fe<sub>3</sub>O<sub>4</sub> NPs and ZnO<sub>2</sub>-Fe<sub>3</sub>O<sub>4</sub>@MV NPs dispersed in water. (b) Surface zeta potentials of Fe<sub>3</sub>O<sub>4</sub>-DHCA NPs, ZnO<sub>2</sub> NPs, ZnO<sub>2</sub>-Fe<sub>3</sub>O<sub>4</sub> NPs, *S. gordonii* MVs and ZnO<sub>2</sub>-Fe<sub>3</sub>O<sub>4</sub>@MV NPs. Error bar: standard deviation (n = 3).

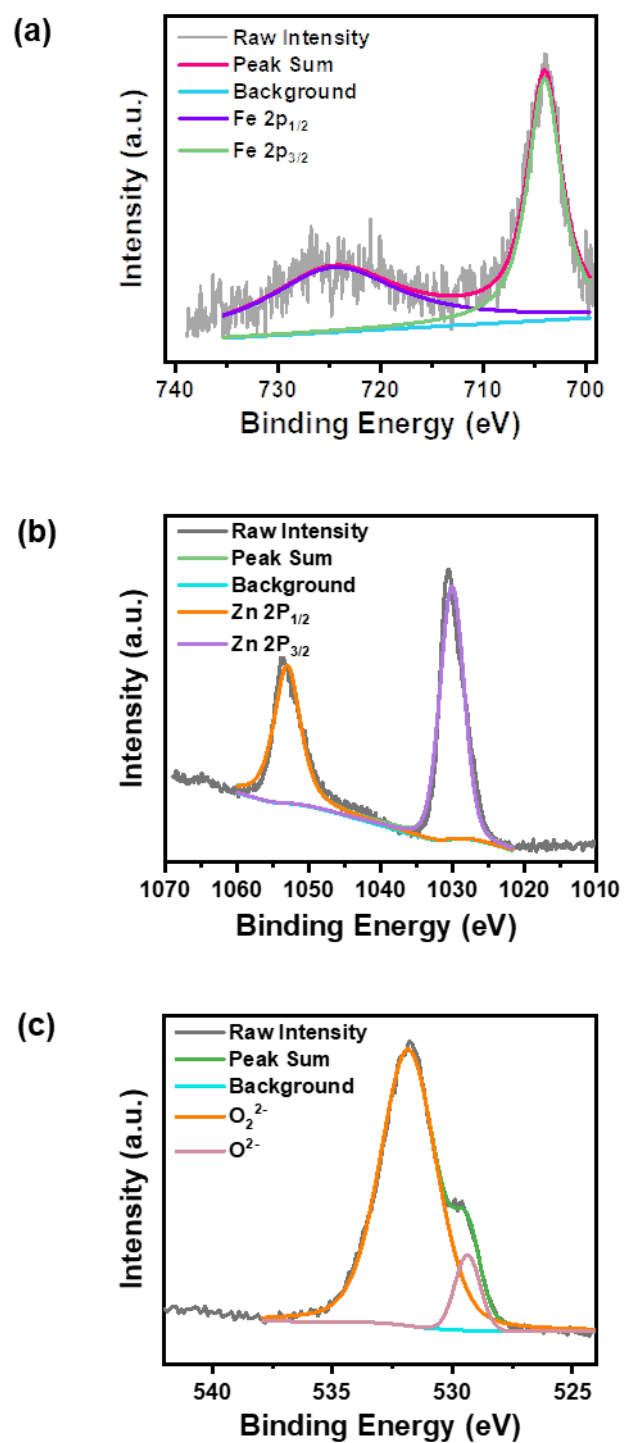

**Fig. S2.** X-ray photoelectron spectroscopy characterization of ZnO<sub>2</sub>-Fe<sub>3</sub>O<sub>4</sub>@MV NPs. XPS spectra of Fe 2p (a), Zn 2p (b) and O 1s (c) for ZnO<sub>2</sub>-Fe<sub>3</sub>O<sub>4</sub>@MV NPs.

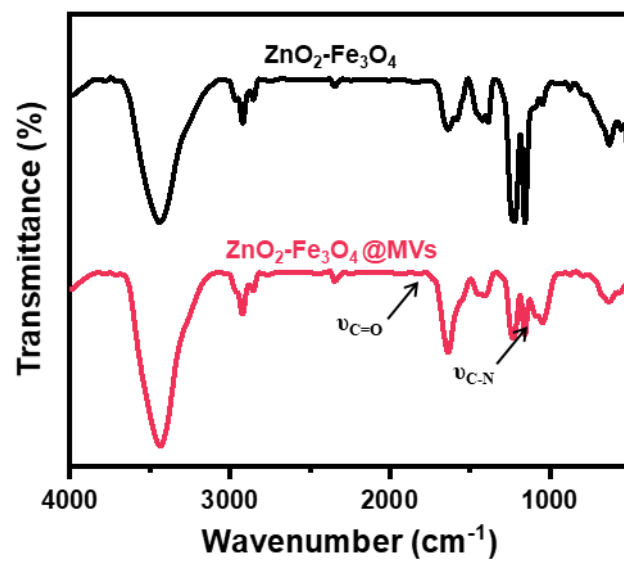

**Fig. S3.** Fourier-transform infrared spectroscopy characterization. FT-IR spectra of  $\text{ZnO}_2\text{-Fe}_3\text{O}_4$  NPs and  $\text{ZnO}_2\text{-Fe}_3\text{O}_4\text{@MV}$  NPs, respectively.

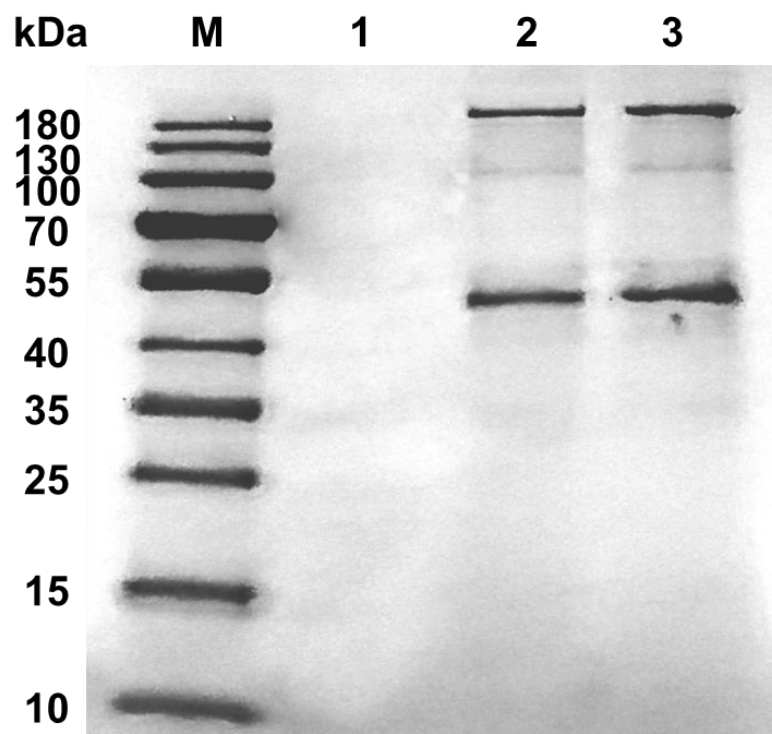

**Fig. S4.** Protein bands of *S. gordonii* MVs by Coomassie brilliant blue staining.

Lane M: Prestained marker

Lane 1: ZnO<sub>2</sub>-Fe<sub>3</sub>O<sub>4</sub> NPs

Lane 2: *S. gordonii* MVs

Lane 3: ZnO<sub>2</sub>-Fe<sub>3</sub>O<sub>4</sub>@MV NPs

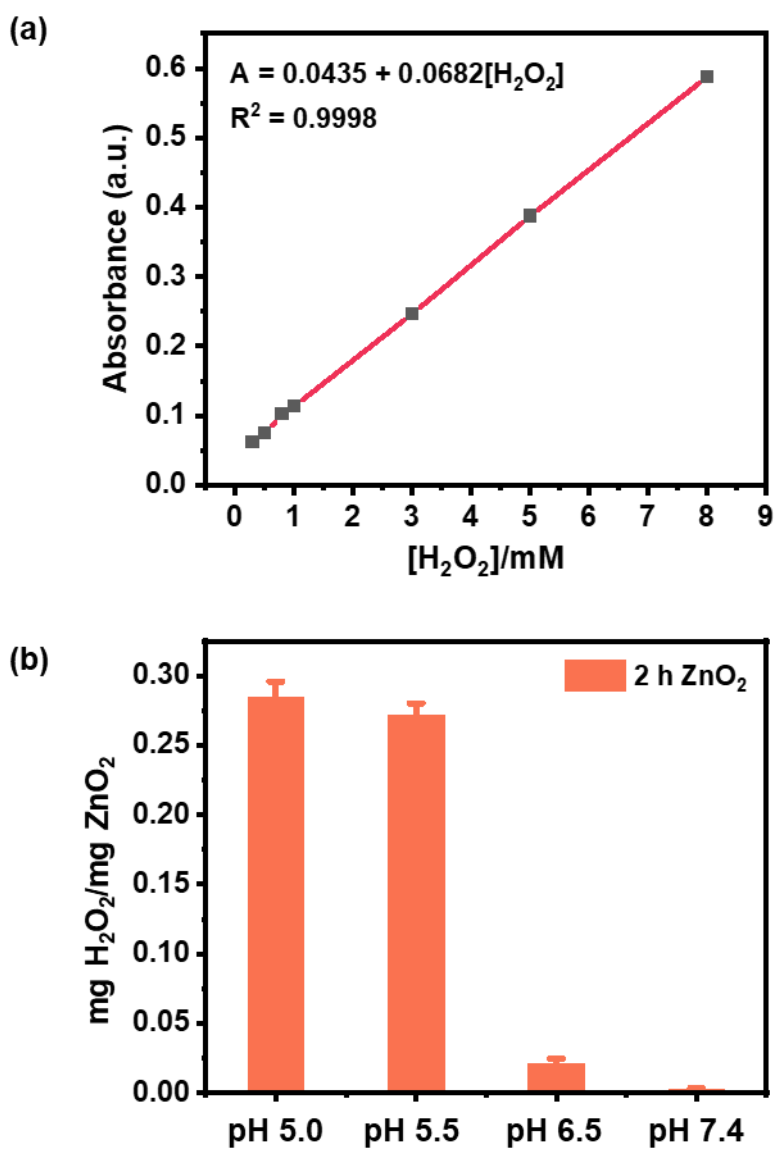

**Fig. S5.** Measurements of H<sub>2</sub>O<sub>2</sub> production by ZnO<sub>2</sub> with Hydrogen Peroxide Content Assay Kit (a) Quantification of H<sub>2</sub>O<sub>2</sub> in ZnO<sub>2</sub> NPs. (b) The ratios of the amount of H<sub>2</sub>O<sub>2</sub> produced to the mass of ZnO<sub>2</sub> at different pH values. Error bar: standard deviation (n = 3).

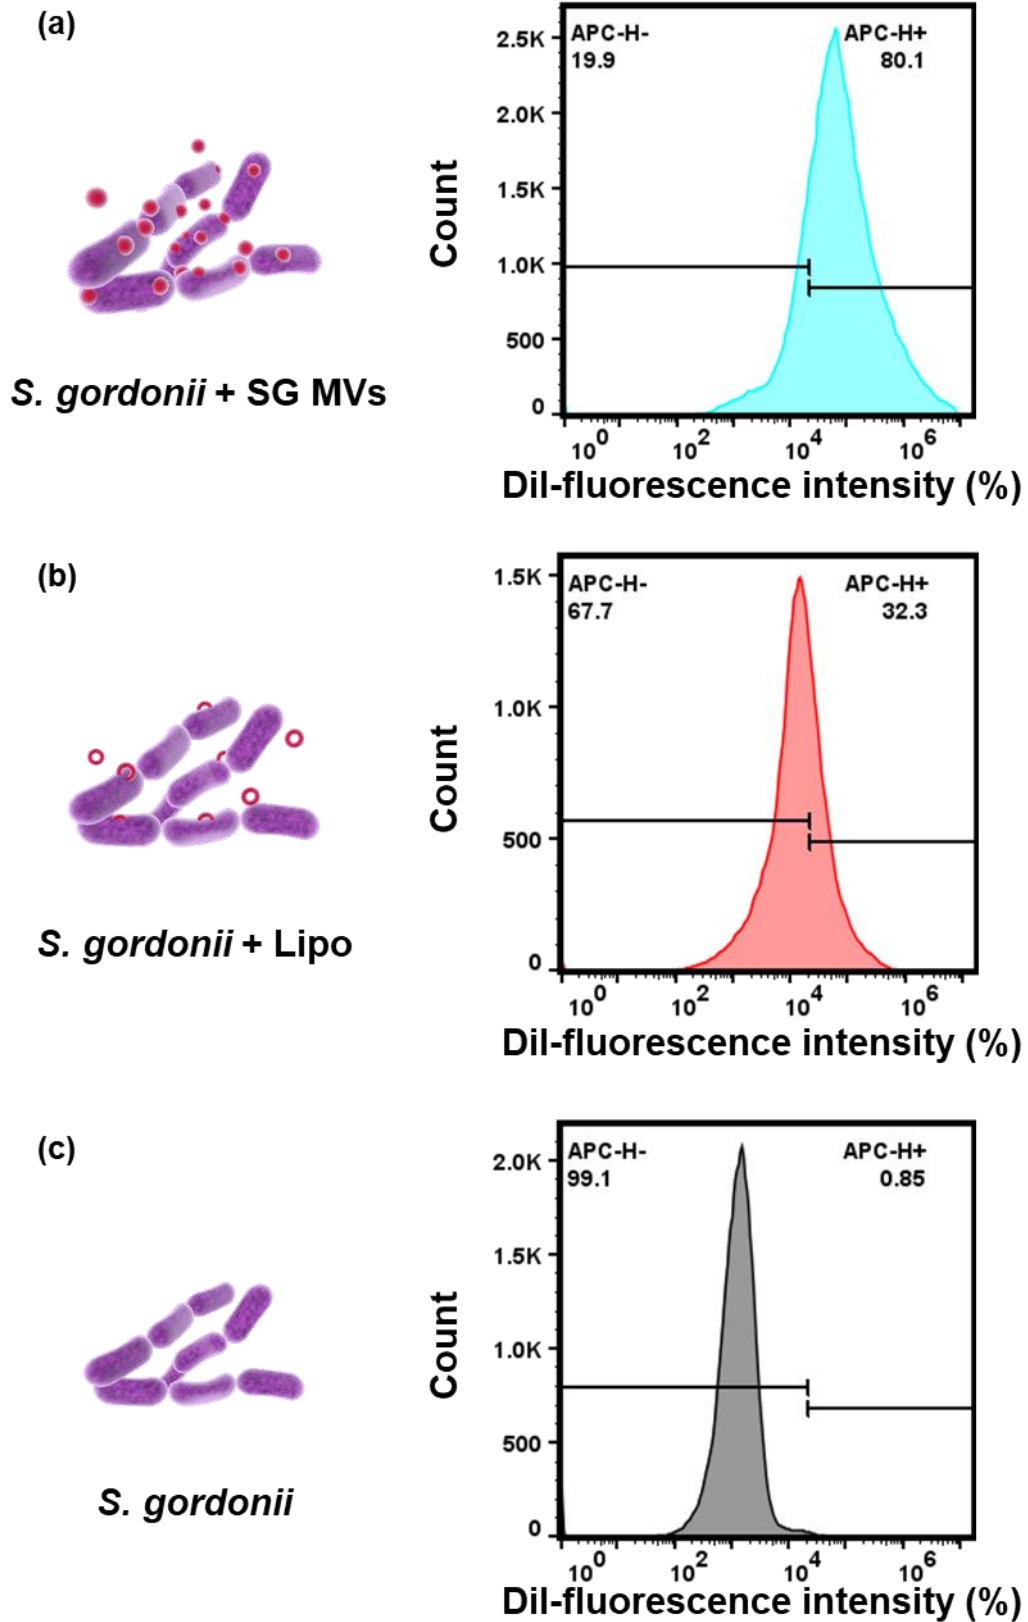

**Fig. S6.** Flow cytometry analysis of the uptake by individual bacteria of Dil-loaded SG MVs from parental *S. gordonii*. Lipo@Dil and PBS were used as control. Flow cytometry counts as a function of the red-fluorescence intensity due to SG MVs and Lipo@Dil uptake by *S. gordonii*.

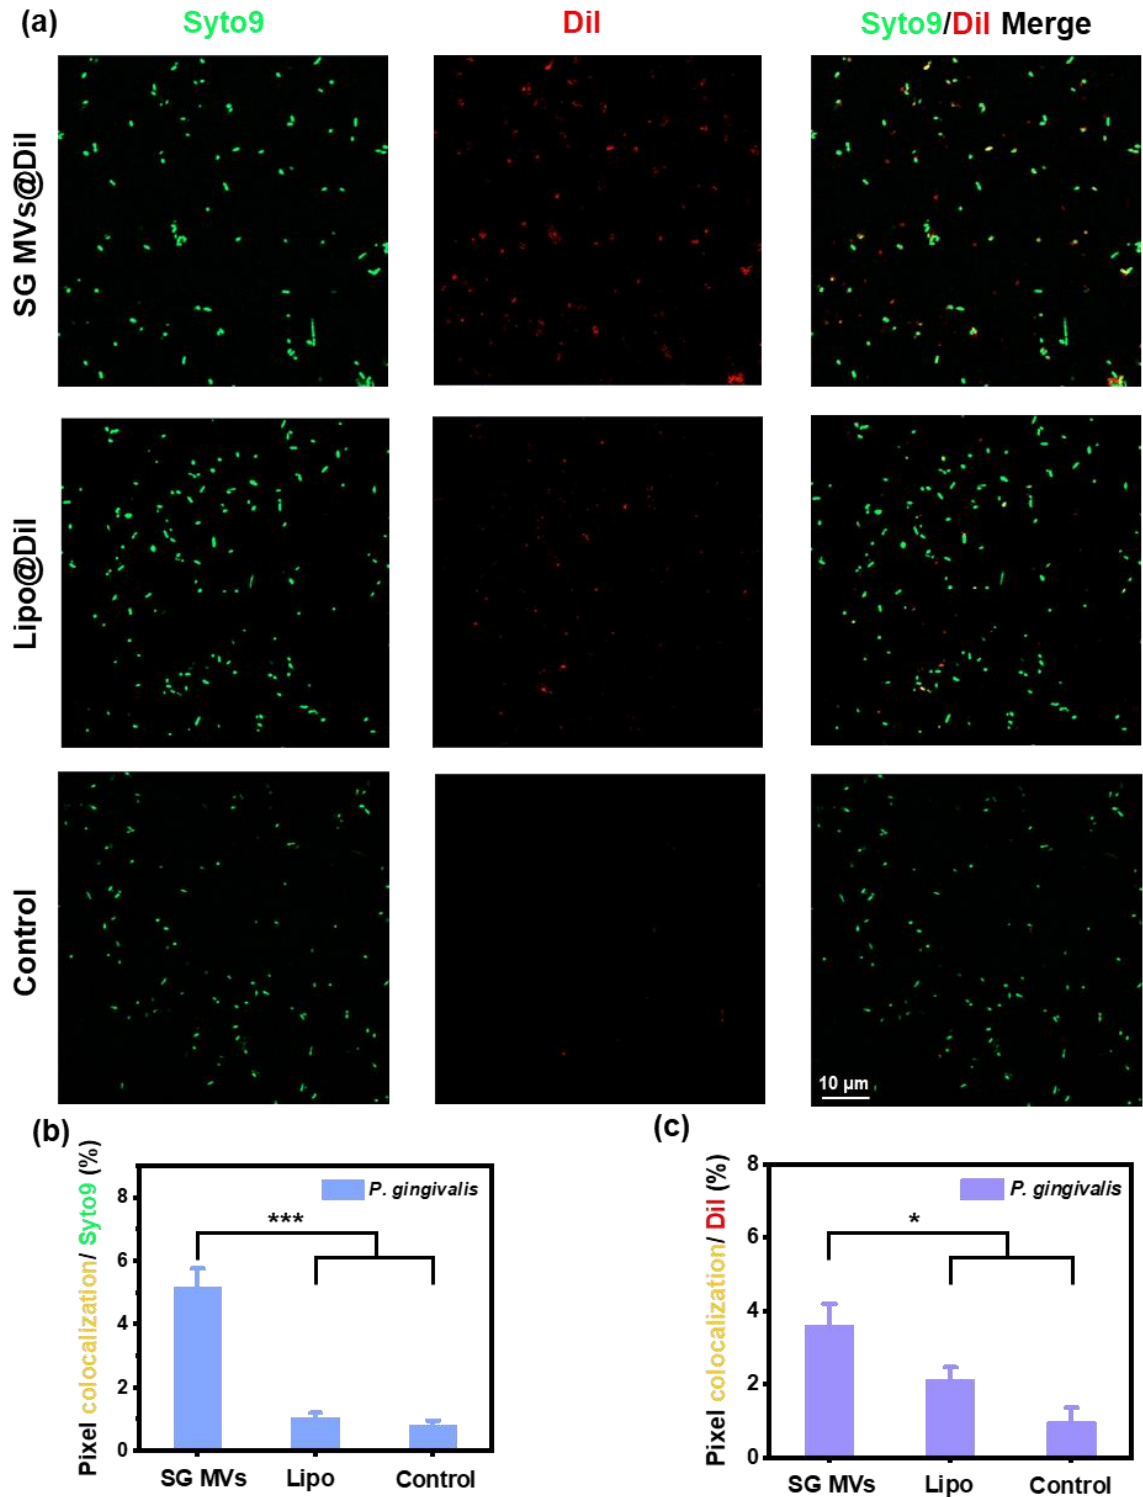

**Fig. S7.** Confocal fluorescence images of *P. gingivalis* incubated with *S. gordonii* MVs and image analysis. (a) Confocal fluorescence images of *P. gingivalis* incubated with SG MVs@Dil, Lipo@Dil, and PBS control for 2 h. Green fluorescence: *P. gingivalis* stained by Syto9,  $E_m$ : 488 nm; Red fluorescence: *S. gordonii* MVs and liposomes stained by Dil,  $E_m$ : 565 nm. Yellow: merge of the green and the red. Scale bar: 10  $\mu\text{m}$ . (b) The area ratios of colocalized pixels of both the green and the red normalized by the pixels of the green (Syto9). (c) The area ratios of colocalized pixels of both the green and the red normalized by the pixels of the red (Dil). Error bar: standard deviation (n = 3). Statistical significance by one-way analysis of variance (\*p < 0.05, \*\*\*p < 0.001).



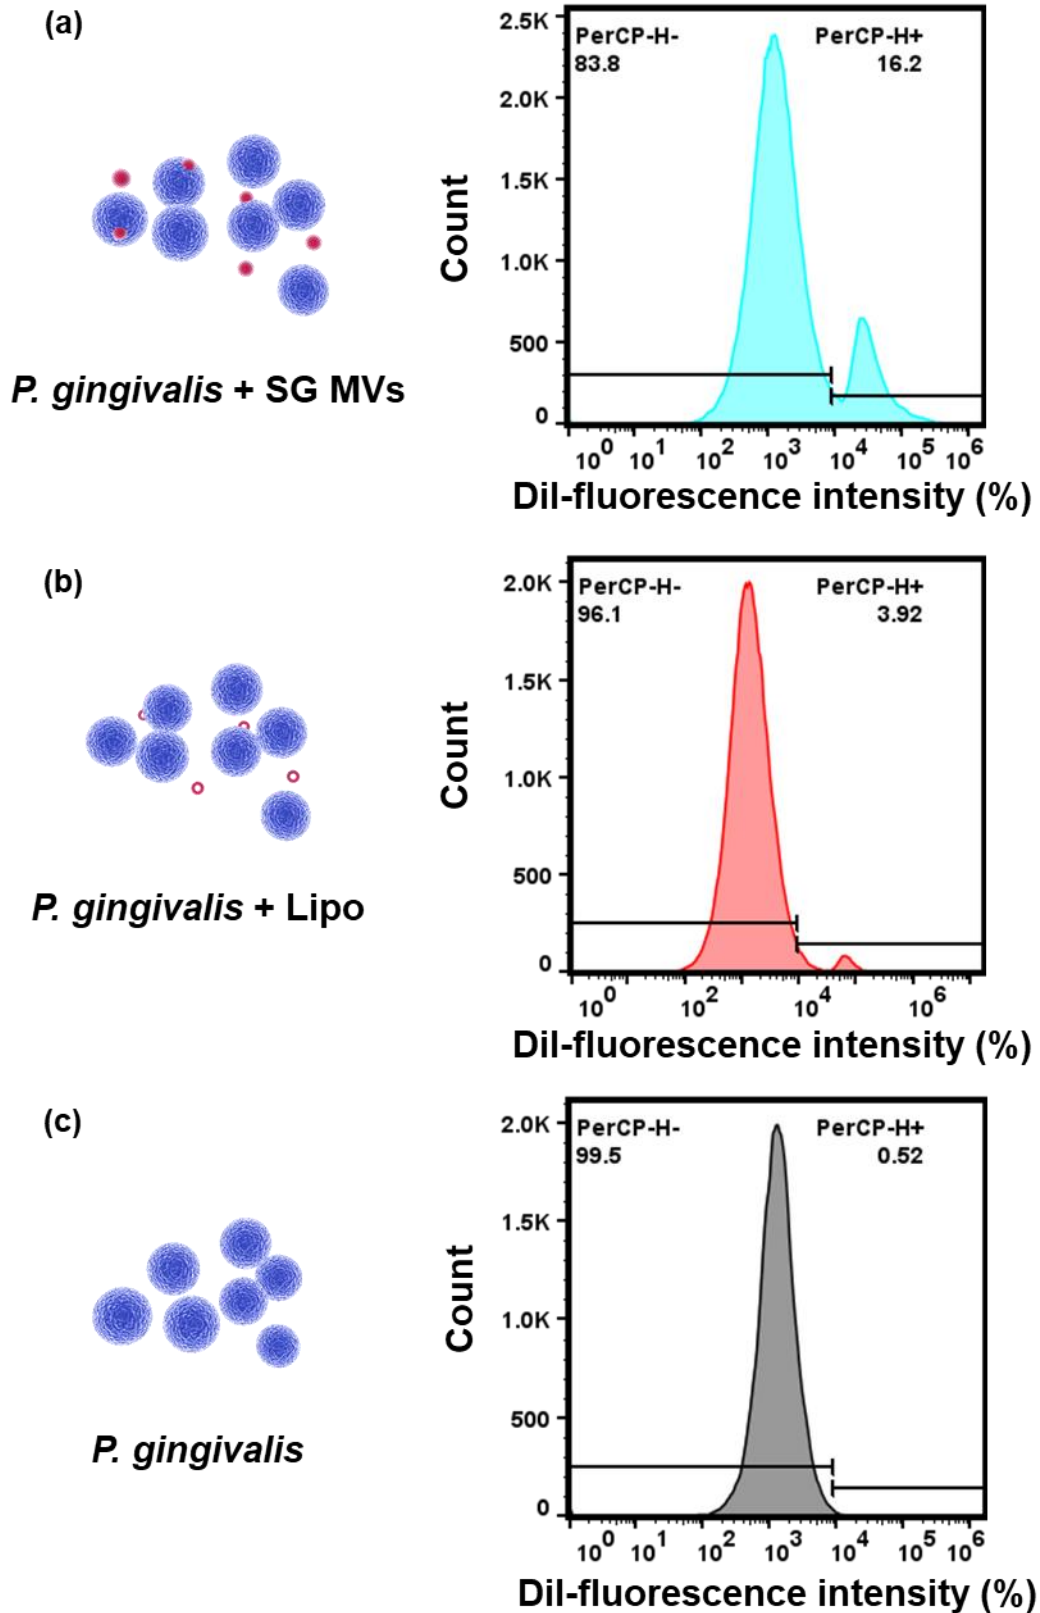

**Fig. S8.** Flow cytometry analysis of the uptake by individual bacteria of Dil-loaded SG MVs from *P. gingivalis*. Lipo@Dil and PBS were used as control. Flow cytometry counts as a function of the red-fluorescence intensity due to SG MVs and Lipo@Dil uptake by *P. gingivalis*.

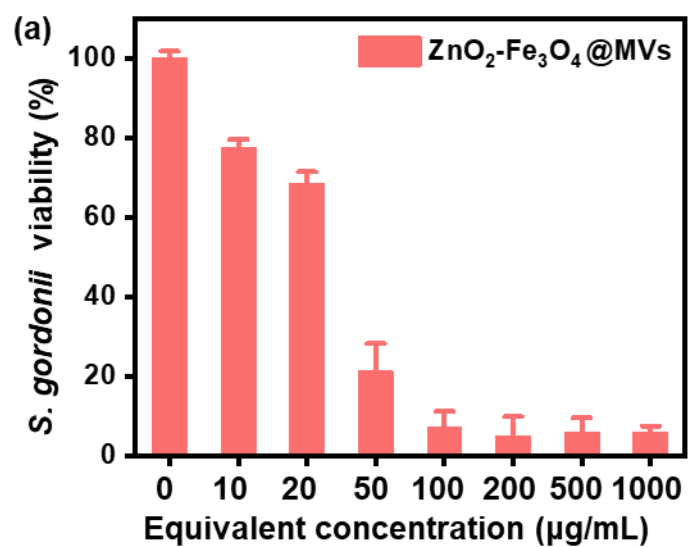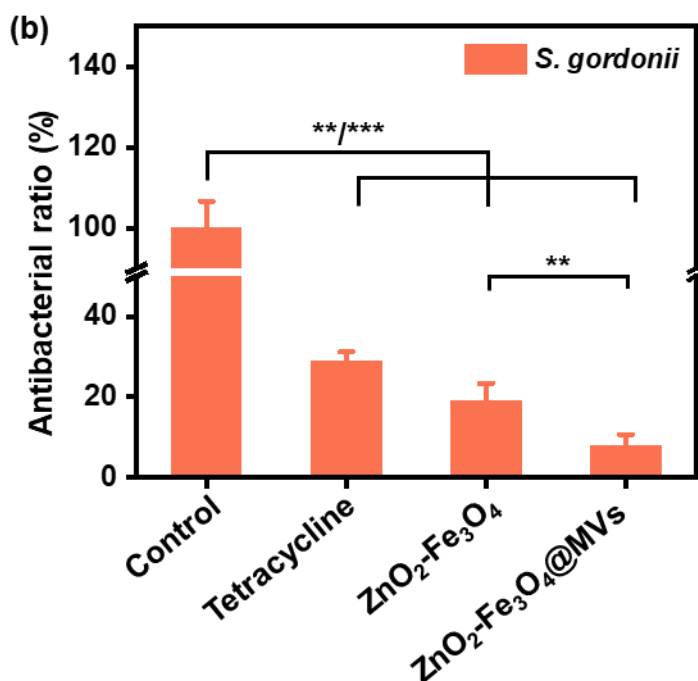

**Fig. S9.** Bacterial viability evaluation by colony counting after (a) the treatment of ZnO<sub>2</sub>-Fe<sub>3</sub>O<sub>4</sub>@MV NPs at different concentrations; and (b) different treatments including PBS, tetracycline, ZnO<sub>2</sub>-Fe<sub>3</sub>O<sub>4</sub> NPs and ZnO<sub>2</sub>-Fe<sub>3</sub>O<sub>4</sub>@MV NPs. Error bar: standard deviation (n = 3). Statistical significance by one-way analysis of variance (\*\*p < 0.01, \*\*\*p < 0.001).

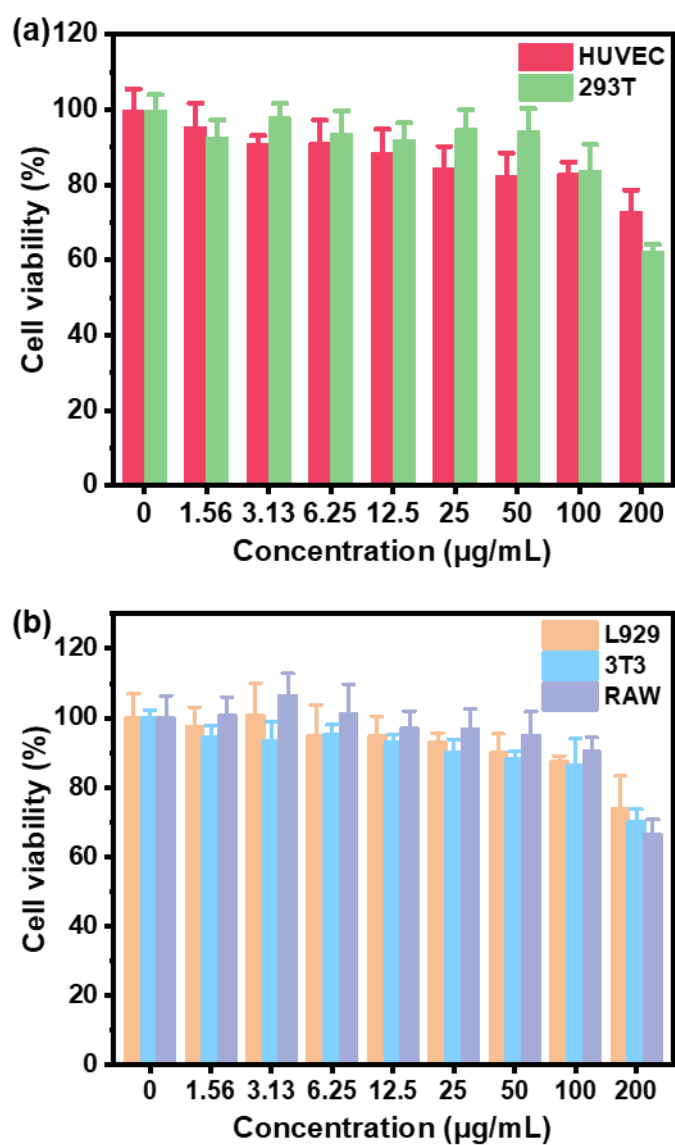

**Fig. S10.** Biocompatibility assessment of ZnO<sub>2</sub>-Fe<sub>3</sub>O<sub>4</sub>@MV NPs. (a) Human derived cell viability evaluation by ZnO<sub>2</sub>-Fe<sub>3</sub>O<sub>4</sub>@MV NPs, including 293T cells and HUVECs cells. (b) The evaluation of the biocompatibility of normal mouse derived cells by ZnO<sub>2</sub>-Fe<sub>3</sub>O<sub>4</sub>@MV NPs, including L929 cells, 3T3 cells and RAW 264.7 cells. Incubation: 24 h. Error bar: standard deviation (n = 3).

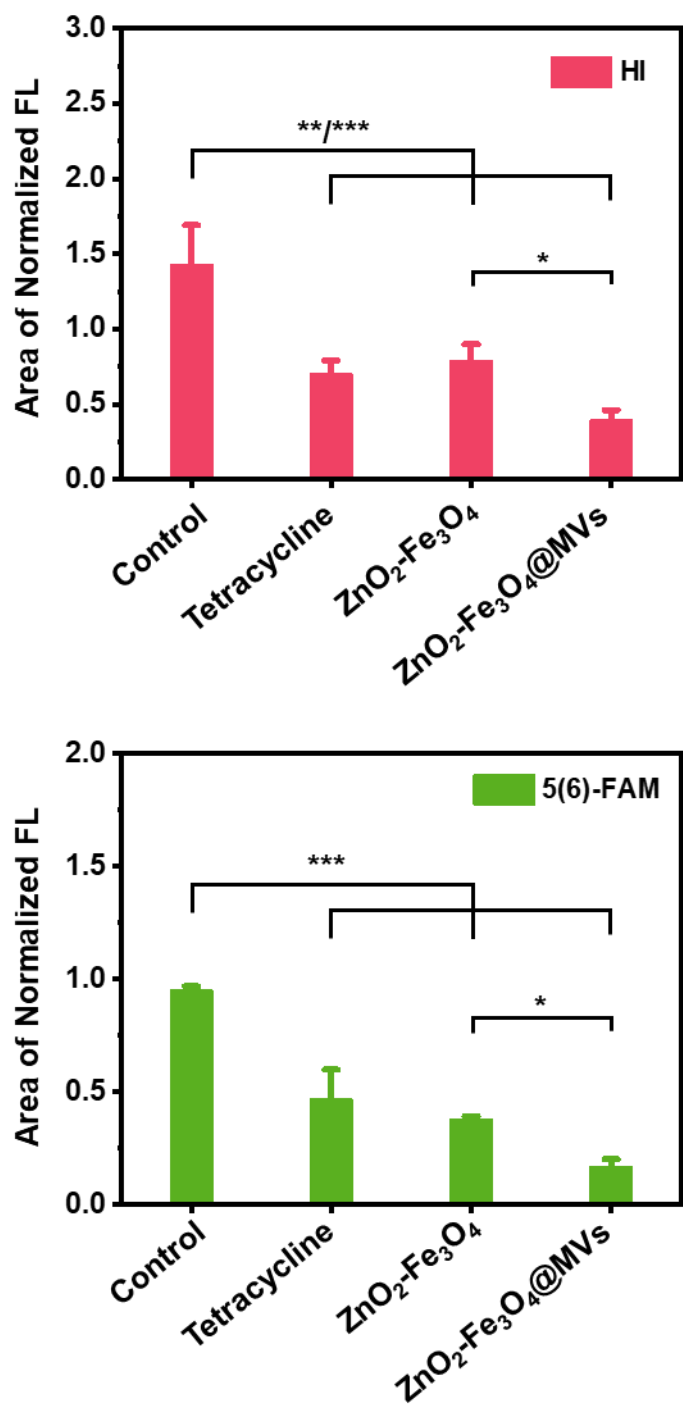

**Fig. S11.** Comparison of the accumulative peak areas from the curves in Fig. 4b-c. Error bar: standard deviation (n = 3). Statistical significance by one-way analysis of variance (\*p < 0.05, \*\*p < 0.01, \*\*\*p < 0.001).

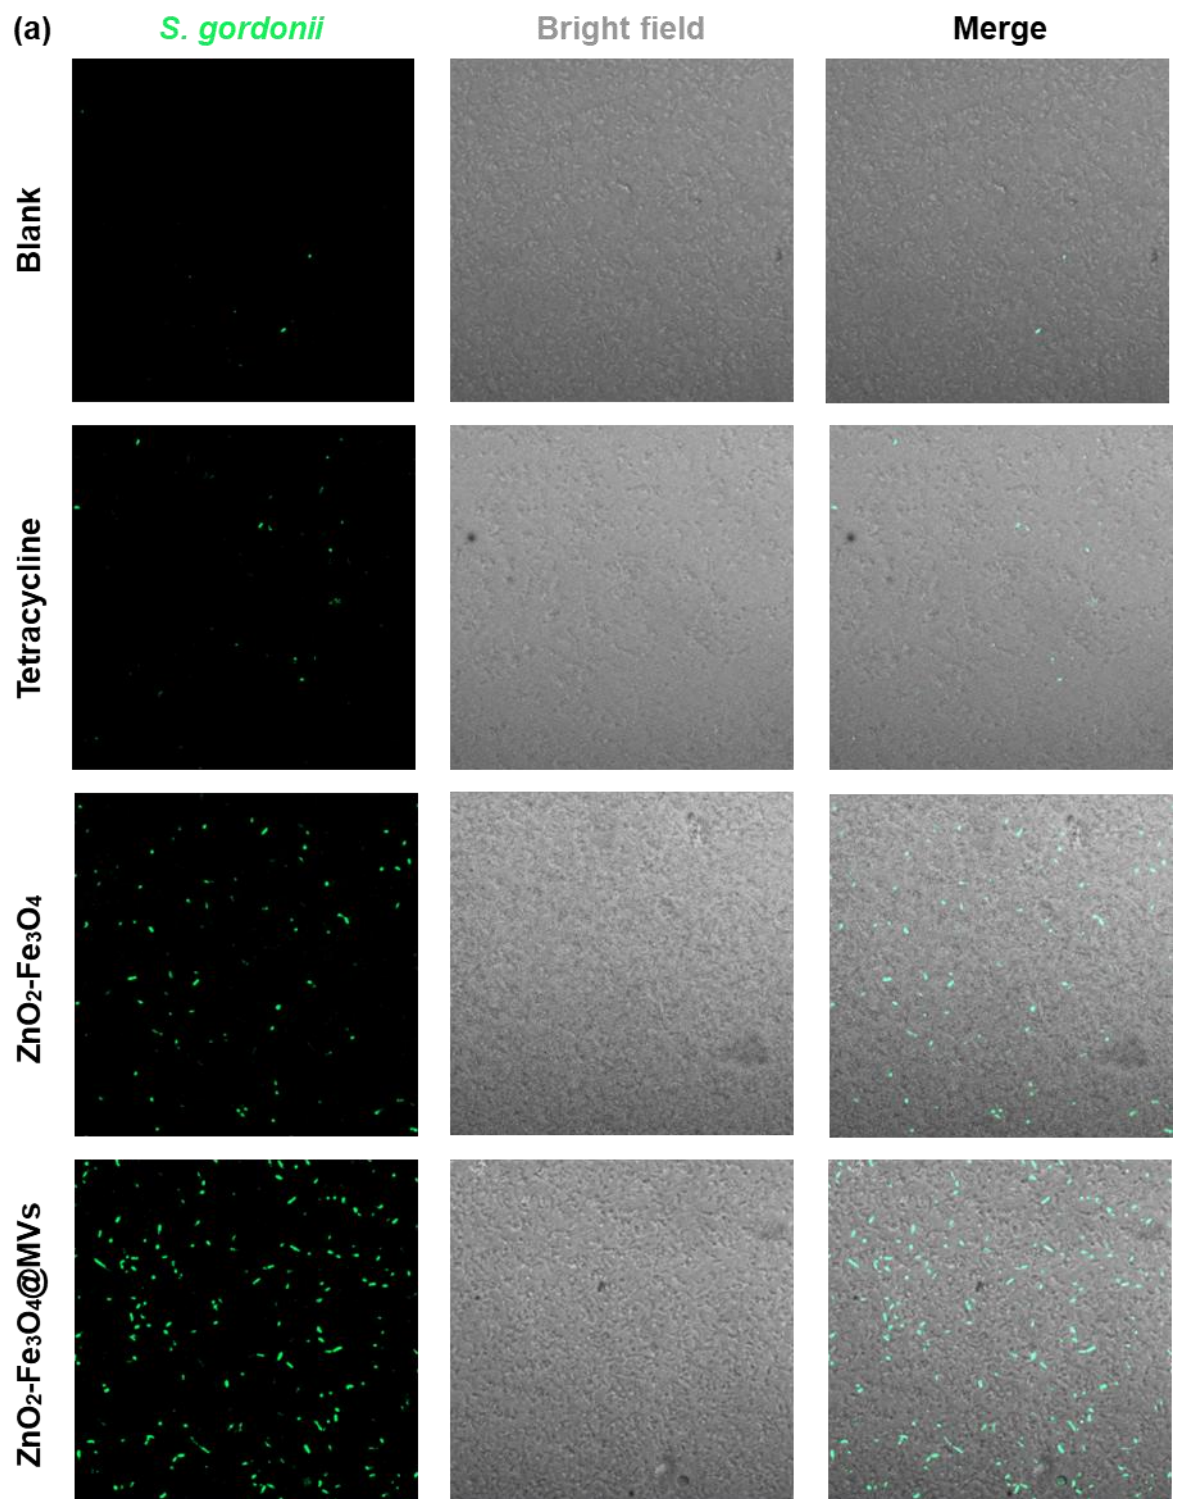

(b)

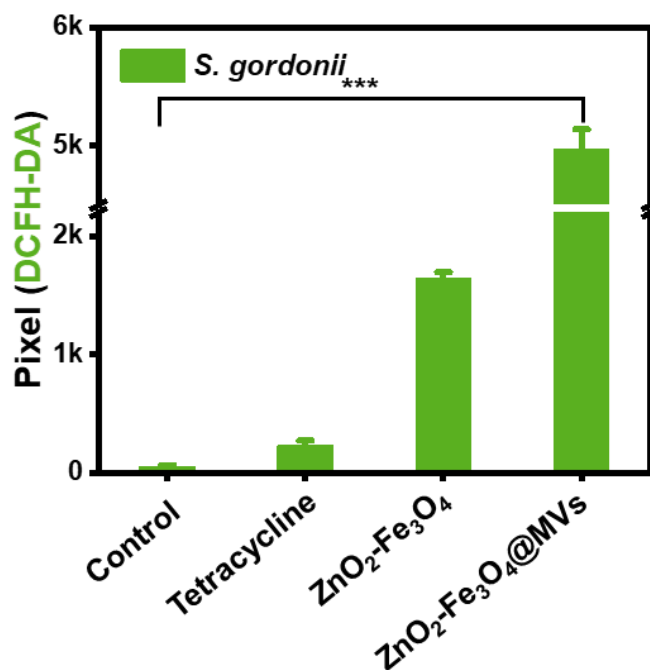

**Fig. S12.** Fluorescence images and analysis of ROS in planktonic bacteria (*S. gordonii*) by different treatments including PBS, tetracycline, ZnO<sub>2</sub>-Fe<sub>3</sub>O<sub>4</sub> NPs and ZnO<sub>2</sub>-Fe<sub>3</sub>O<sub>4</sub>@MV NPs. (a) Fluorescence images of planktonic bacteria (*S. gordonii*). ROS probe: DCFH-DA. (b) Accumulative pixel areas of the fluorescence images at the channel of DCFH-DA. Error bar: standard deviation (n = 3).

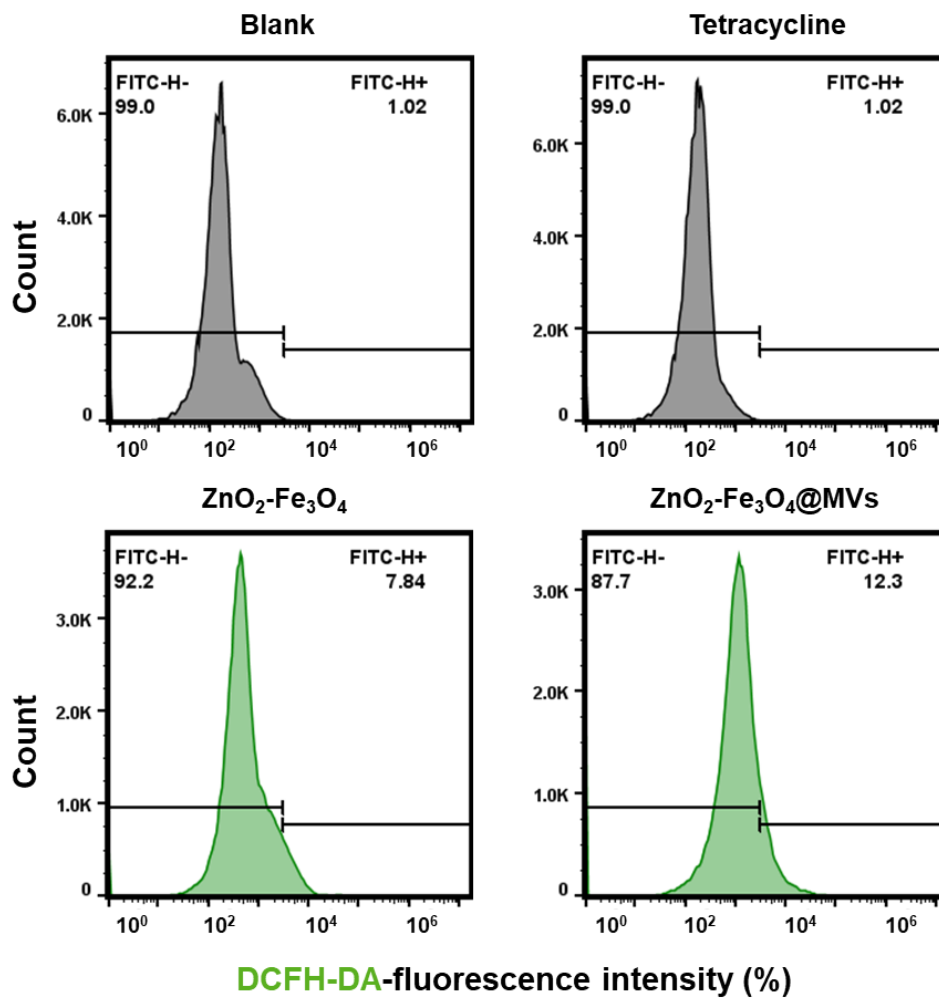

**Fig. S13.** Flow cytometry analysis of the uptake by ROS in planktonic bacteria (*S. gordonii*) by different treatments including PBS, tetracycline, ZnO<sub>2</sub>-Fe<sub>3</sub>O<sub>4</sub> NPs and ZnO<sub>2</sub>-Fe<sub>3</sub>O<sub>4</sub>@MV NPs. ROS probe: DCFH-DA.

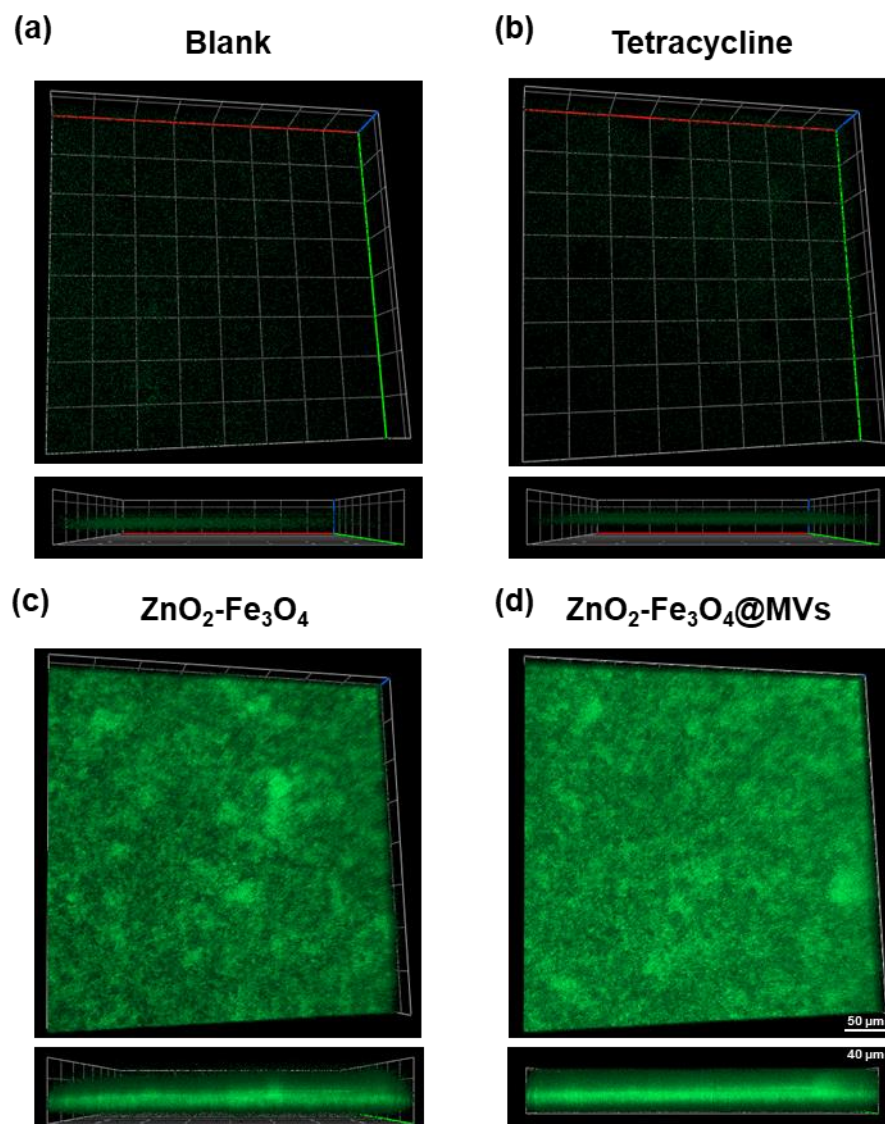

**Fig. S14.** Fluorescence images and analysis of ROS in symbiotic biofilms by different treatments including (a) PBS, (b) tetracycline, (c)  $\text{ZnO}_2\text{-Fe}_3\text{O}_4$  NPs and (d)  $\text{ZnO}_2\text{-Fe}_3\text{O}_4\text{@MV}$  NPs. ROS probe: DCFH-DA.



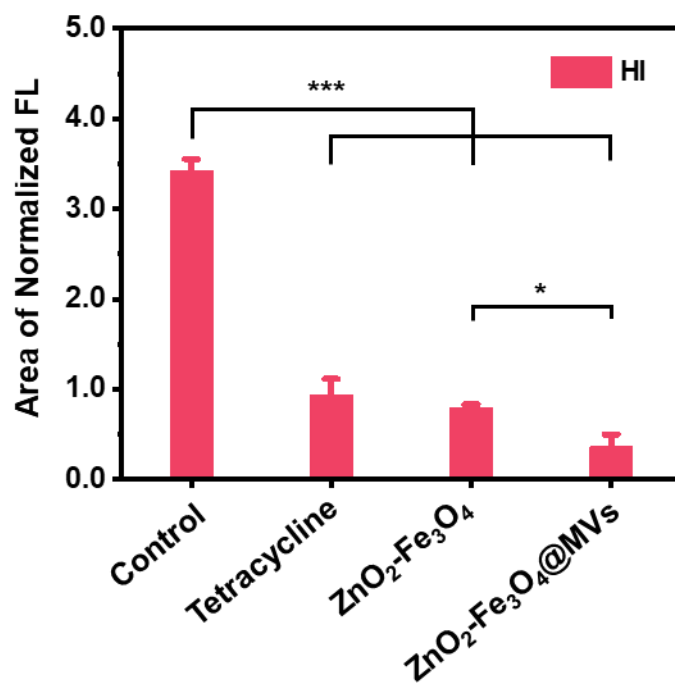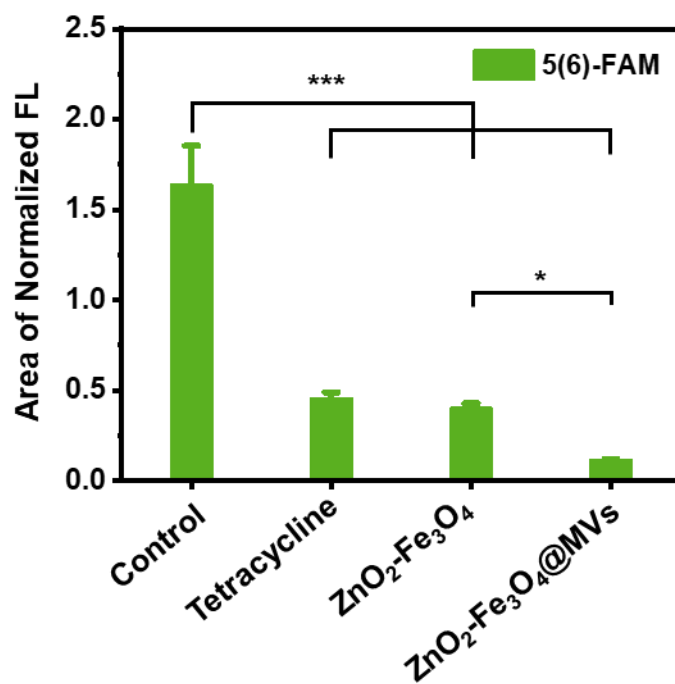

**Fig. S15.** Comparison of the accumulative peak areas from the curves in Fig. 5b-c. Error bar: standard deviation (n = 3). Statistical significance by one-way analysis of variance (\*p < 0.05, \*\*\*p < 0.001).
